# Supplementary material for: Pumpkin stem-derived activated carbons as counter electrodes for dye-sensitized solar cells
Source: Royal Society of Chemistry journal article supplement (doi:10.1039/c4ra12585a), 2014-11-14
Supplement: c4ra12585a1.pdf [file c4ra12585a1.pdf]

## **Pumpkin stem-derived activated carbons as counter electrodes for dye-sensitized solar cell applications**

**Rajesh Madhu,<sup>a</sup> Vedyappan Veeramani,<sup>a</sup> Shen-Ming Chen,<sup>\*a</sup> Jayabal Palanisamy<sup>b</sup> and A. T. Ezhil Vilian<sup>a</sup>**

*<sup>a</sup>Electroanalysis and Bioelectrochemistry Lab, Department of Chemical Engineering and Biotechnology, National Taipei University of Technology, Taipei 10608, Taiwan.*

*Corresponding author: E-mail: [smchen78@ms15.hinet.net](mailto:smchen78@ms15.hinet.net) (S.M. Chen)*

*<sup>b</sup>Department of Laser Studies, School of Physics, Madurai Kamaraj University, Madurai-625021, India.*

***\*Corresponding author:***

Tel: (886)-2-27017147; Fax: (886)-2-27025238

E-mail: [smchen78@ms15.hinet.net](mailto:smchen78@ms15.hinet.net) (Prof. S.M.Chen)

Figure S1

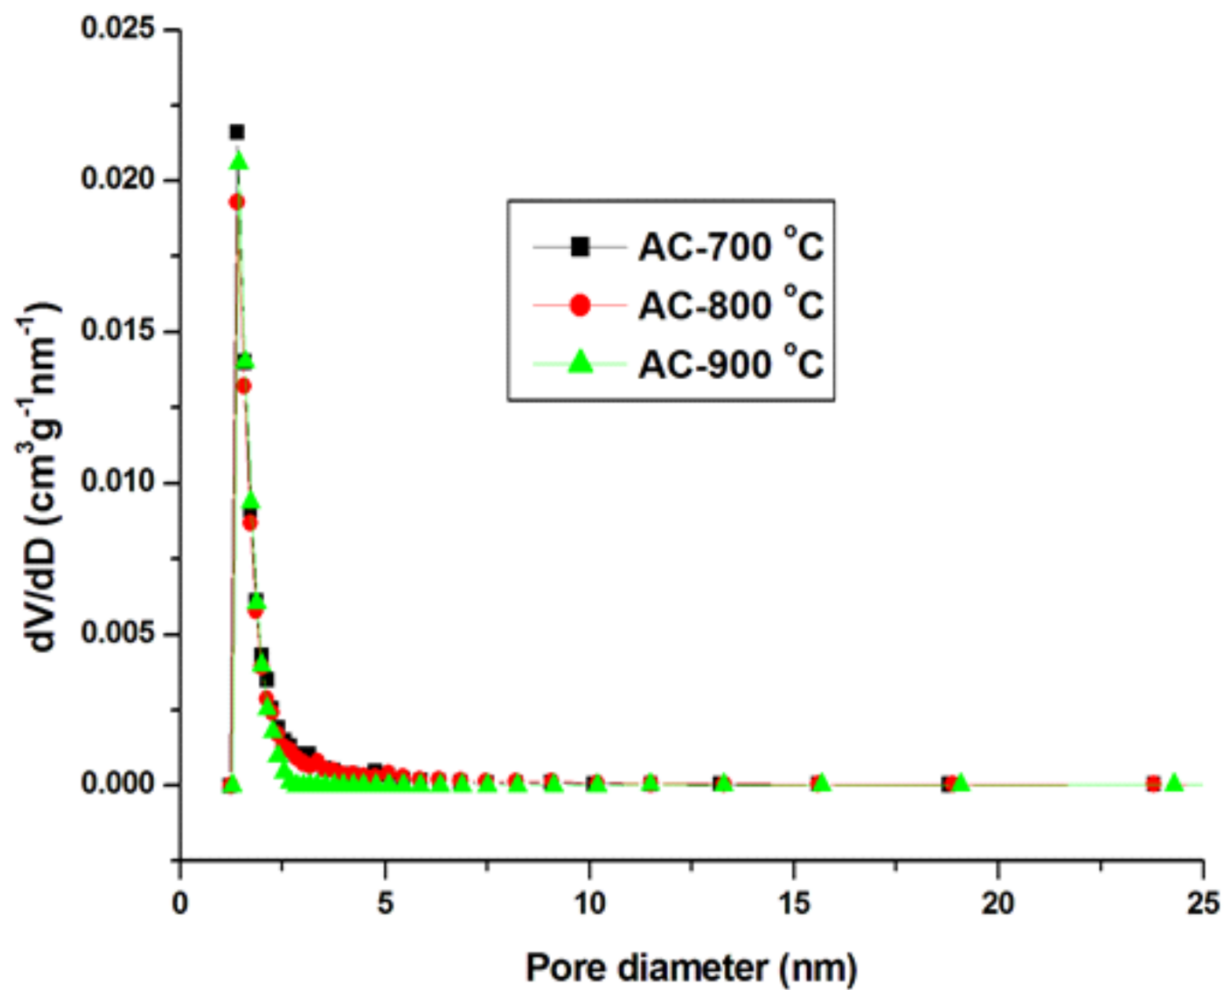

Fig. S1 Pore-size distributions of ACs.

**Table S1:** Comparison of Photovoltaic parameters of DSSCs made with AC counter electrodes and graphene

| <b>Counter Electrode</b> | <b>J<sub>sc</sub> (mA cm<sup>-2</sup>)</b> | <b>V<sub>oc</sub> (V)</b> | <b>FF</b> | <b>η (%)</b> | <b>Ref.</b> |
|--------------------------|--------------------------------------------|---------------------------|-----------|--------------|-------------|
| Graphene                 | 07.70                                      | 0.68                      | 0.54      | 2.82         | 1           |
| Graphene                 | 14.52                                      | 0.67                      | 0.45      | 4.46         | 2           |
| Graphene                 | 06.12                                      | 0.64                      | 0.56      | 2.19         | 3           |
| Graphene                 | 05.60                                      | 0.70                      | 0.60      | 2.30         | 4           |
| Graphene                 | 14.30                                      | 0.54                      | 0.65      | 5.69         | 5           |
| Graphene                 | 08.11                                      | 0.72                      | 0.46      | 2.64         | 6           |
| Graphene                 | 06.42                                      | 0.70                      | 0.16      | 0.74         | 7           |
| Functionalized Graphene  | 13.16                                      | 0.64                      | 0.60      | 4.99         | 8           |
| Graphene                 | 05.6                                       | 0.76                      | 0.70      | 3.0          | 9           |
| AC700                    | 03.84                                      | 0.61                      | 0.48      | 2.79         | This Work   |

## References

- [1] A. Kaniyoor, S. Ramaprabhu, *J. Appl. Phys.*, 2011, **109**, 124308.
- [2] D.W. Zhang, X.D. Li, H.B. Li, S. Chen, Z. Sun, X.J. Yin, S.M. Huang, *Carbon*, 2011, **49**, 5382–5388
- [3] C. T. Hsieh, B. H. Yang, J. Y. Lin, *Carbon*, 2011, **49**, 3092–3097.
- [4] H. Choi, S. Hwang, H. Bae, S. Kim, H. Kim, M. Jeon, *Electron. Lett.*, 2011, **47**, 1-2.
- [5] H. Choi, H. Kim, S. Hwang, Y. Han, M. Jeon, *J. Mater. Chem.*, 2011, **21**, 7548–7551.
- [6] R. Cruz, D. Alfredo, P. Tanaka, A. Mendes, *Sol. Energy*, 2012, **86**, 716–724.
- [7] L. Wan, S. Wang, X. Wang, B. Dong, Z. Xu, X. Zhang, B. Yang, S. Peng, J. Wang, C. Xu, *Solid State Sci.*, 2011, **13**, 468–475.
- [8] J. D. R. Mayhew, D. J. Bozym, C. Punckt, I. A. Aksay, *ACS Nano*, 2010, **4**, 6203-6211.
- [9] H. Choi, H. Kim, S. Hwang, W. Choi, M. Jeon, *Sol. Energ. Mater. Sol. C.*, 2011, **95**, 323–325.
